# Supplementary material for: An ab initio insight into the Cu(111)-mediated Ullmann reaction
Source: Royal Society of Chemistry journal article supplement (doi:10.1039/c0cp00759e), 2010-10-26
Supplement: c0cp00759e.pdf [file c0cp00759e.pdf]

## Supporting Information

# An *ab initio* insight into the Cu(111)–mediated Ullmann reaction

*Manh-Thuong Nguyen\**, *Carlo A. Pignedoli* and *Daniele Passerone\**

Empa, Swiss Federal Laboratories for Materials Science and Technology, nanotech@surfaces  
laboratory, Ueberlandstrasse 129, CH-8600 Dübendorf, Switzerland

\*Corresponding authors: manh-thuong.nguyen@empa.ch, daniele.passerone@empa.ch

### **Absorption of Phenyl on Cu(111)**

Figure S1B illustrates the general geometry of PG on a substrate, in which  $\Phi$  is the angle between the  $C_1C_4$  axis and the surface plane;  $\omega$  is the angle describing the rotation of the mirror symmetry plane of PG about  $C_1C_4$ , which is set to be zero when this plane is orthogonal to the surface. Starting with various initial geometries, we find different stable high-symmetry optimized positions of PG on Cu(111) (Fig. S1C–F).

### **Migration of Phenyl on Cu(111)**

Figure S2 provides other diffusion pathways of Phenyl on Cu(111). It is found that these transitions require much higher activation energies compared to the path presented in the main manuscript.

### **Absorption of Biphenyl on Cu(111)**

Figure S3 shows some high-symmetry adsorption positions of biphenyl on Cu(111). In the gas

phase, the torsion angle between the two  $\pi$ -planes of biphenyl is about  $44.4^\circ$ .<sup>1</sup> However, the adsorbed molecule in our calculations becomes almost planar, in agreement with experimental observations<sup>2</sup>. Stable adsorption geometries of biphenyl on Cu(111) are similar to the case of benzene, a relative of biphenyl, on the same surface.<sup>3</sup> The binding energy of the most stable structure is -1.3 eV.

### Adsorption of two approaching Phenyls on Cu(111)

Figure S4 presents several adsorption geometries of two phenyls when they approach each other. Total energy of the system is significantly lowered when the spacing between them decreases and their adsorption positions are similar to the favorable one of single phenyls (as shown in Figure S1.C)

By performing the routine B→J→E→P (all in Figure S4), the system can reach the lowest energy structure (Figure S4.P) from the “well separated” geometry (Figure S4.B). The activation energy for this process is 0.09 eV.

### References:

- <sup>1</sup>A. Almendinger, O. Bastiansen, L. Fernholt, B. N. Cyvin, S. J. Cyvin, S. Samdal. *J. Mol. Struct.* **128**, 59 (1985)
- <sup>2</sup>M. Xi and B. E. Bent, *Surf. Sci.* **278**,19 (1992)
- <sup>3</sup> K. Berland, T. L. Einstein, P. Hyldgaard, *Phys. Rev. B.* **80**, 155431 (2009)

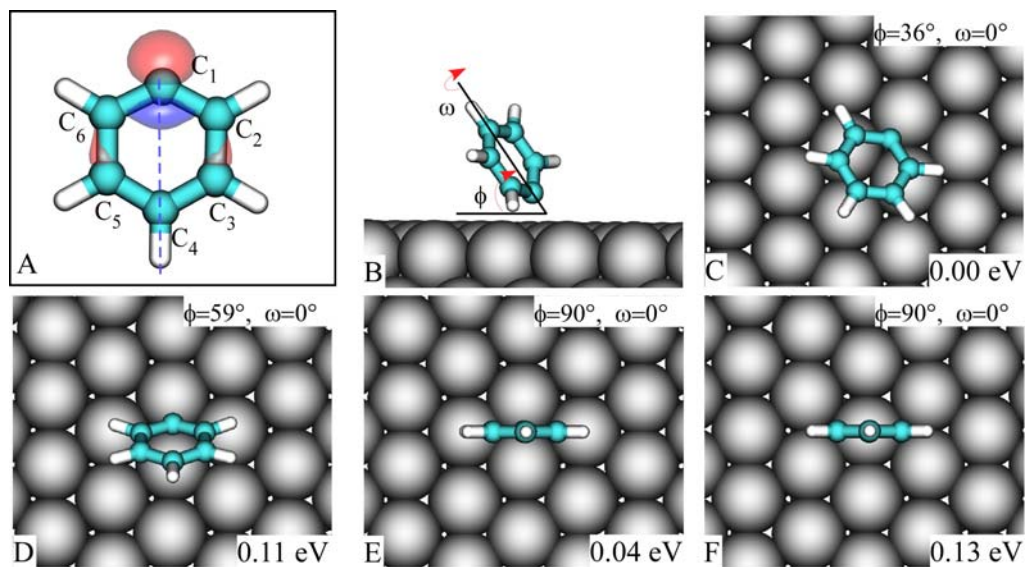

**Figure S1.** Phenyl and its single occupied molecular orbital (A), general geometry of phenyl on Cu(111) (B) and the most stable geometries of phenyl on Cu(111) (C-F). Total energies are relative to the lowest one.

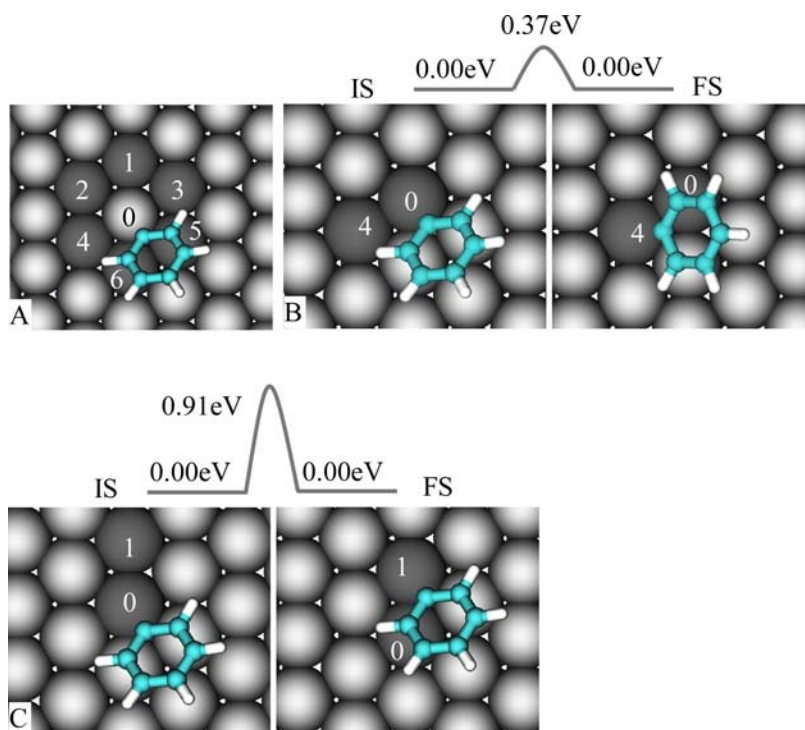

**Figure S2.** Direct diffusion pathways of Phenyl on Cu(111): Cu<sub>0</sub>-Cu<sub>4</sub> (B) and Cu<sub>0</sub>-Cu<sub>1</sub> (C) transitions

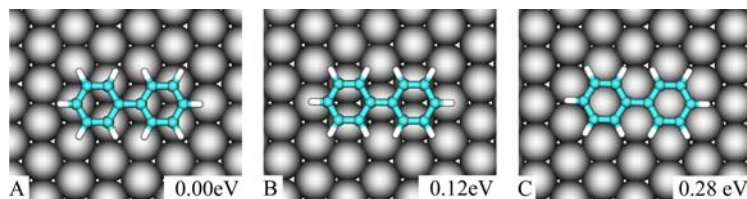

**Figure S3.** Some high-symmetry adsorption geometries of biphenyl on Cu(111) with total energies relative to the lowest one (A)

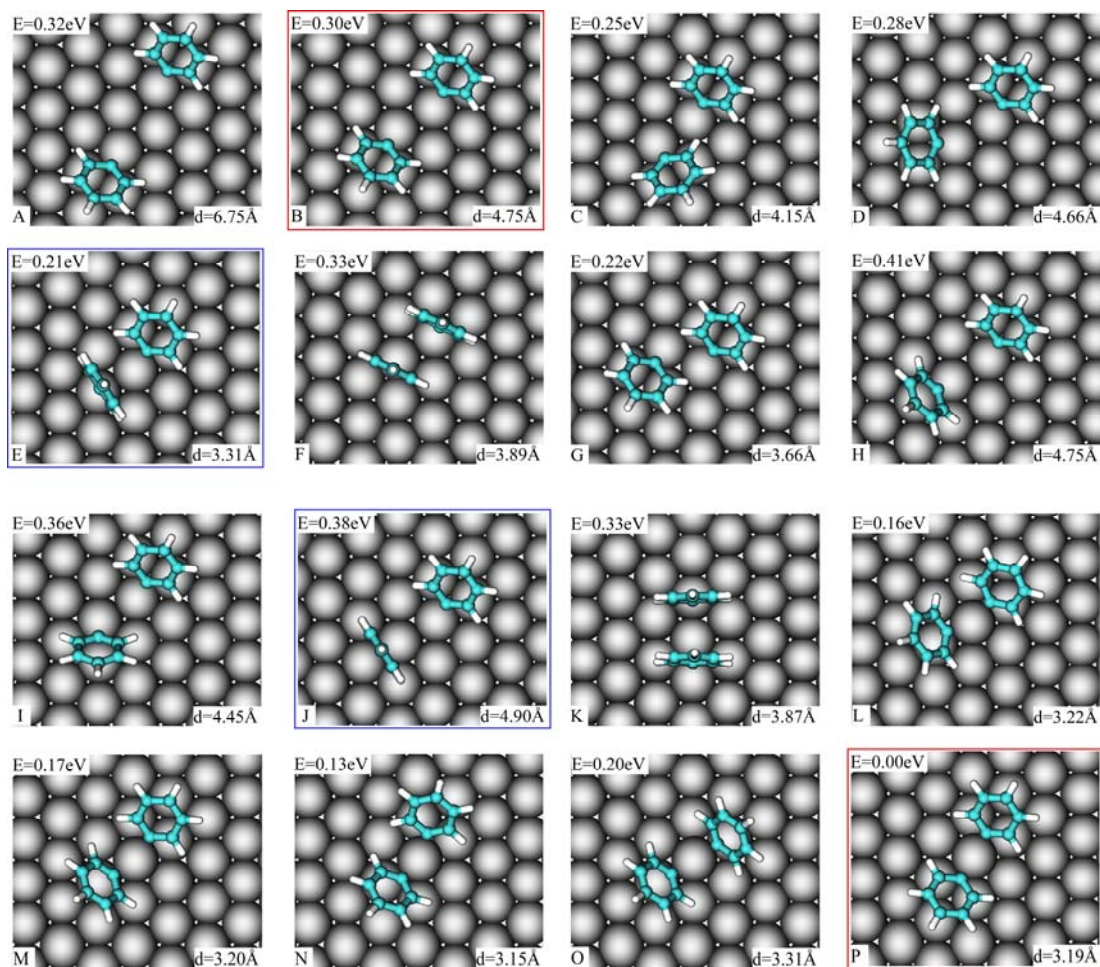

**Figure S4.** Adsorption position, energy relative to the lowest one and C<sub>1</sub>-C<sub>1</sub> separation in various geometries of two PGs on Cu(111) when they approach each other. The dashed red lines in M and N indicate the initial positions (before relaxations) of the C<sub>1</sub>C<sub>4</sub> axes of PGs. The red frames highlight the two typical configurations with both PGs are in the favorable positions, they are connected by the geometries in the blue frames.
